# Supplementary material for: Targeting the Melanocortin 1 Receptor in Melanoma: Biological Activity of α-MSH Peptide Conjugates
Source: Preprints.org preprint supplement (doi:10.20944/preprints202311.1667.v1), 2023-11-27

**Targeting the melanocortin 1 receptor in melanoma: biological activity of α-MSH peptide conjugates**

Ildikó Szabó*, Beáta Biri-Kovács, Ivan Ranđelović, Balázs Vári, Diána Vári-Mező, Szilvia Bősze, József Tóvári, Gábor Mező*

*Correspondence to: Dr. Ildikó Szabó, Research Group of Peptide Chemistry, Eötvös L. Research Network, Eötvös L. University, 1518 Budapest, Pázmány P. stny. 1/A, Hungary; Tel.: (+36)-1-209-0555/1409; Fax: (+36)-1-372-2620; e-mail: [ildiko.szabo@ttk.elte.hu](mailto:ildik.oszabo@ttk.elte.hu) and Prof. Dr. Gábor Mező, Research Group of Peptide Chemistry, Eötvös L. Research Network, Eötvös L. University, 1117 Budapest, Pázmány P. stny. 1/A, Hungary; Tel.: (+36)-1-209-0555/1433; Fax: (+36)-1-372-2620; e-mail: [gabor.mezo@ttk.elte.hu](mailto:gmezo@elte.hu)

**Table of Contents:**

Materials for peptide synthesis and conjugation……………........................................................................S2

HPLC chromatogram and mass spectra of **Conj1**………………………….……………...………………...S3

HPLC chromatogram and mass spectra of **Conj2**………………………………...........................................S4

HPLC chromatogram and mass spectra of **Conj3**…...………………………….……………………………S5

HPLC chromatogram and mass spectra of **Conj4**...........................................................................................S6

Acute toxicity of **Conj2** on BALB/c…………………………………………………………………………….S7

In vivo antitumor effect of **Conj1**, **2**, **3** and free Dau in B16 murine melanoma bearing C57BL/6 mice…………...………………………………………………………………………………………………….S8

Acute toxicity of **Conj2** and **Conj4** male NOD-SCID mice…………………………………………………S9

*Materials for peptide synthesis and conjugation*

Amino acid derivatives and resins were obtained from Iris Biotech (Marktredwitz, Germany). Reagents, such as N,N′-diisopropylcarbodiimide (DIC), triisopropylsilane (TIS), 1-hydroxybenzotriazole (HOBt), 1,8-diazabicyclo[5.4.0]undec-7-ene (DBU) were purchased from Sigma (Budapest, Hungary). Trifluoroacetic acid (TFA) and acetonitrile (AcN) were from VWR (Budapest, Hungary). N,N-dimethylformamide (DMF), dichlormethane (DCM), diethyl ether, and ethanol were purchased from Reanal (Budapest, Hungary)

**Figure S1-S4.** **HPLC chromatogram and mass spectra of Conj1-Conj4**

The retention time was obtained on a Phenomenex Jupiter C12 column with the applied linear gradient. The peak detection was measured at λ = 214 nm. The MS spectrum was measured on a Thermo Scientific Q Exactive Focus Hybrid Quadrupole-Orbitrap Mass Spectrometer. Detailed instrument and method parameters were described in the methods section (S3-S4).


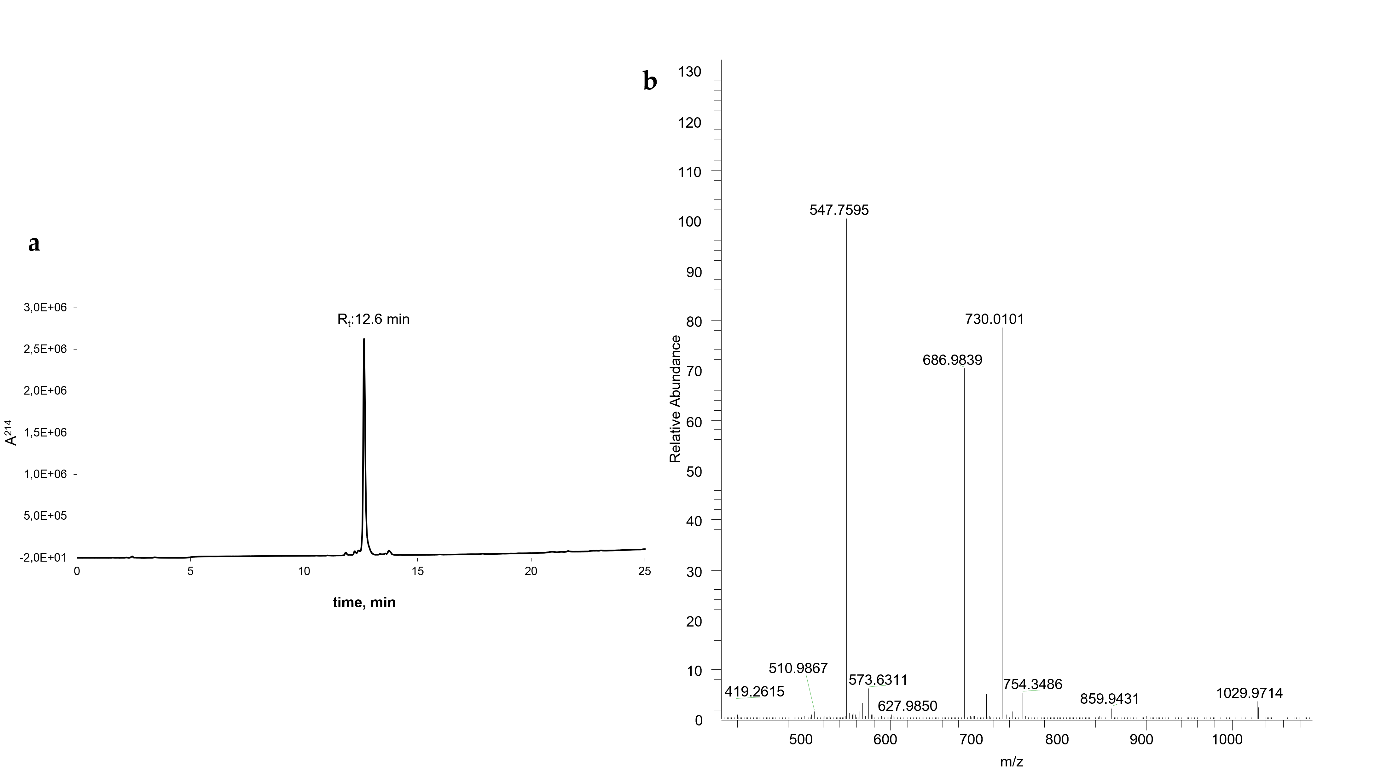


**Figure S1.** RP-HPLC chromatogram (**a**) and ESI-HRMS spectrum (**b**) of **Conj1**


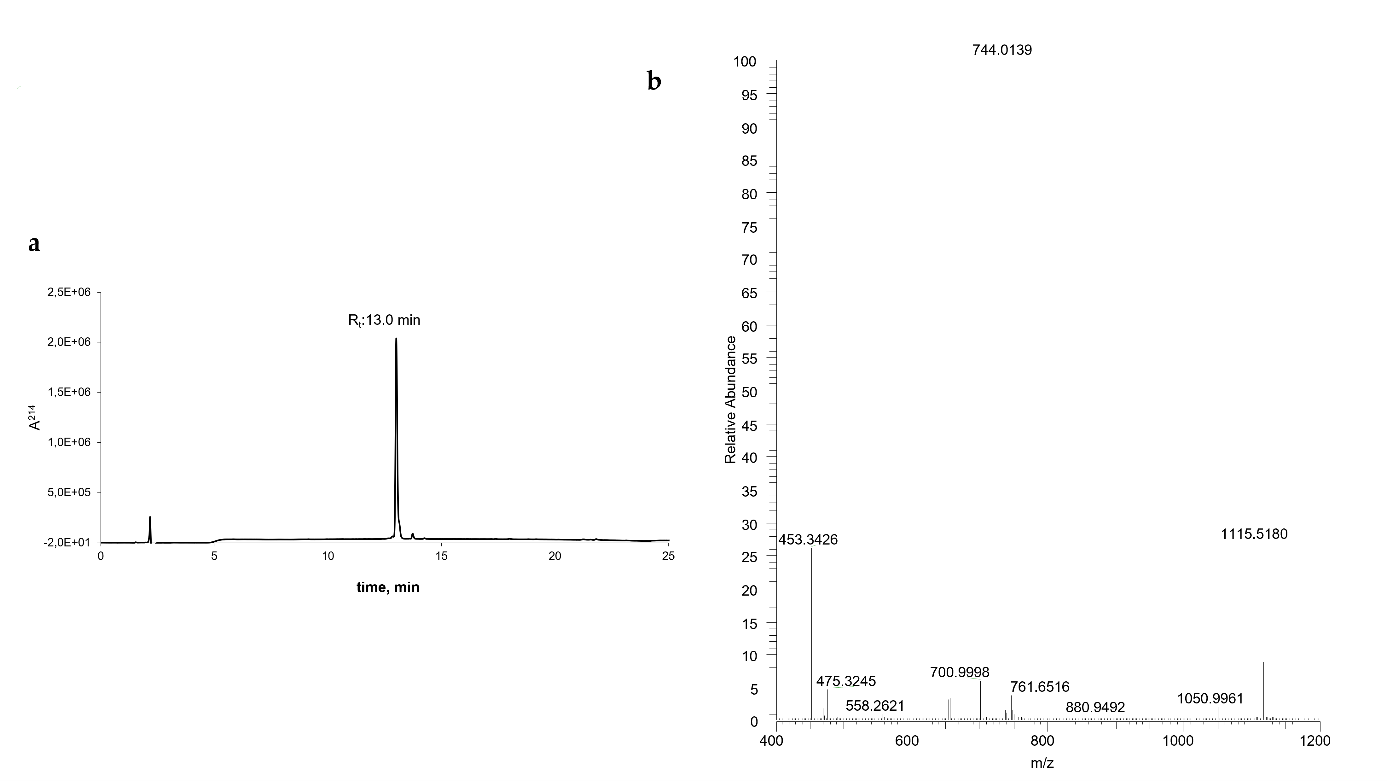


**Figure S2.** RP-HPLC chromatogram (**a**) and ESI-HRMS spectrum (**b**) of **Conj2**


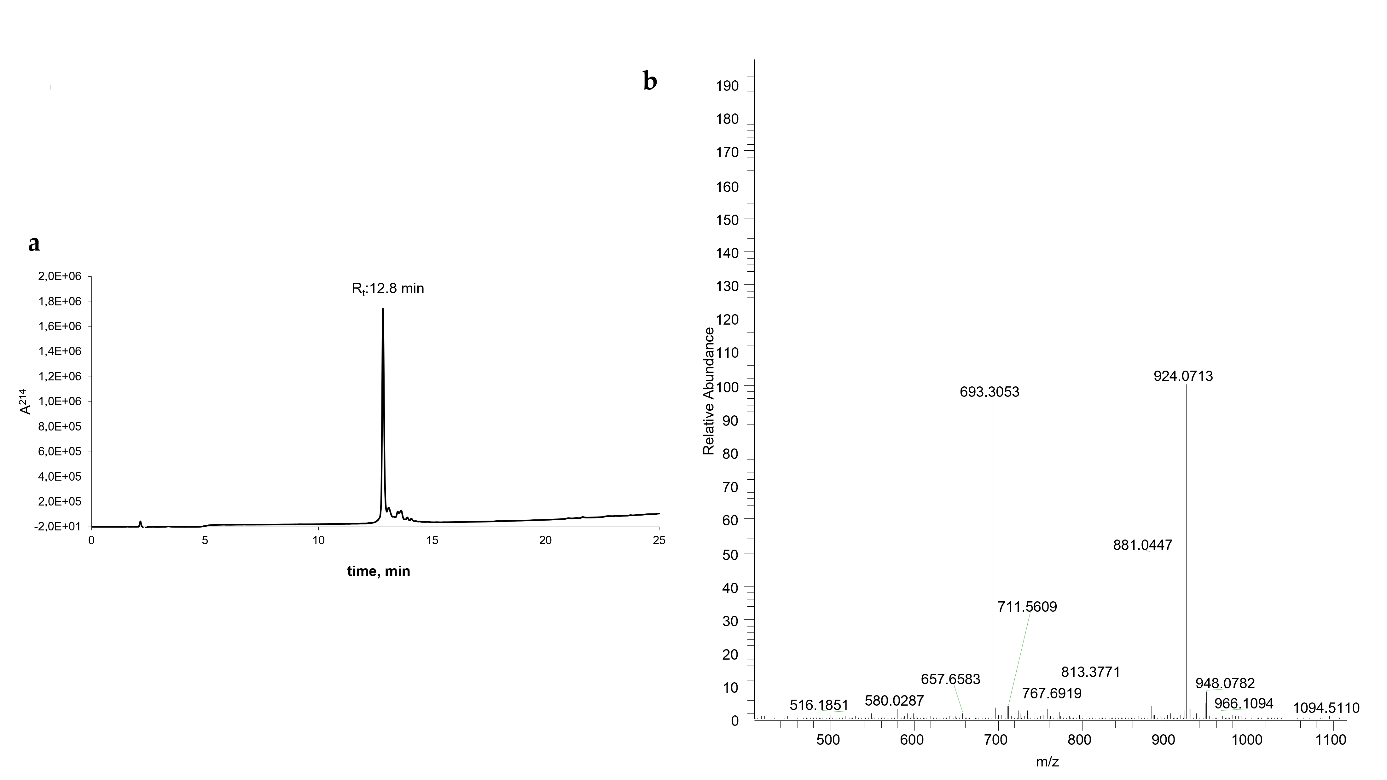


**Figure S3.** RP-HPLC chromatogram (**a**) and ESI-HRMS spectrum (**b**) of **Conj3**


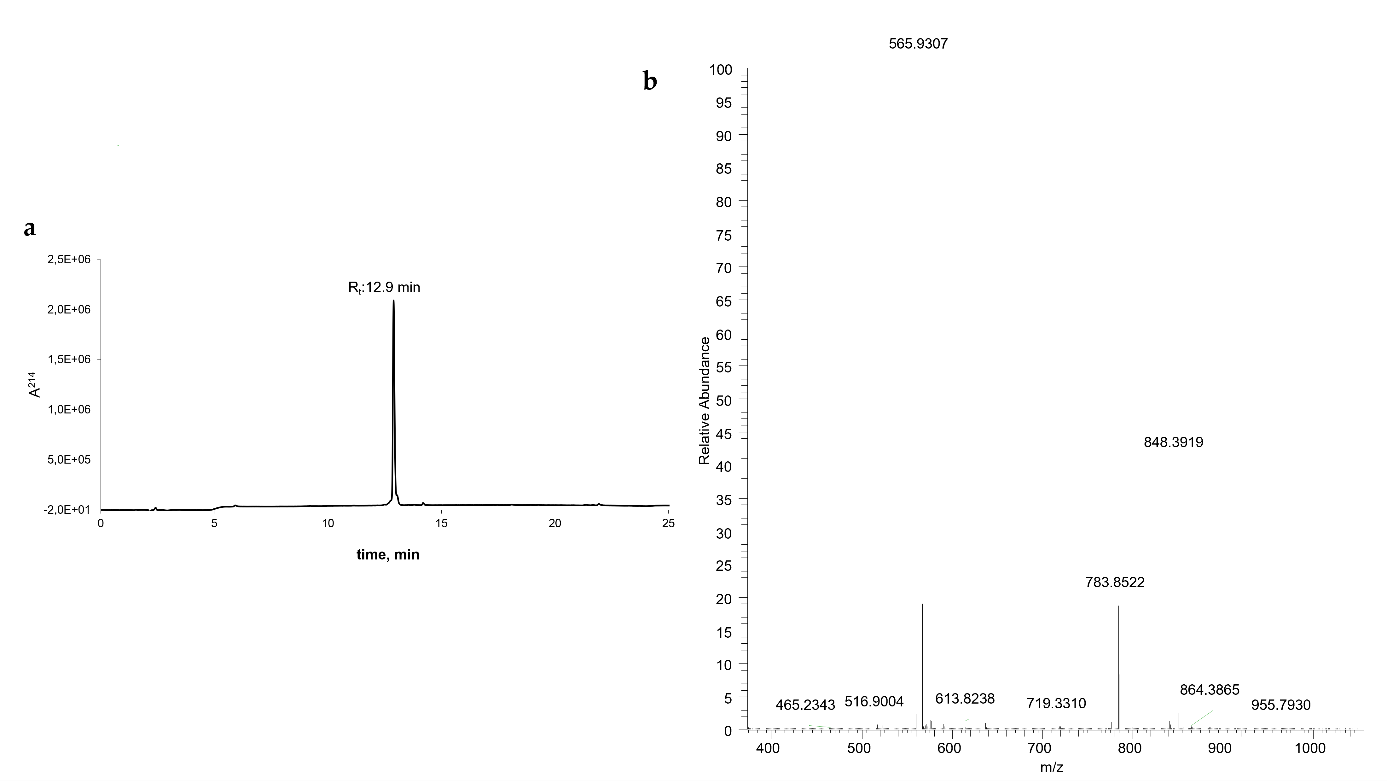


**Figure S4**. RP-HPLC chromatogram (**a**) and ESI-HRMS spectrum (**b**) of **Conj4**


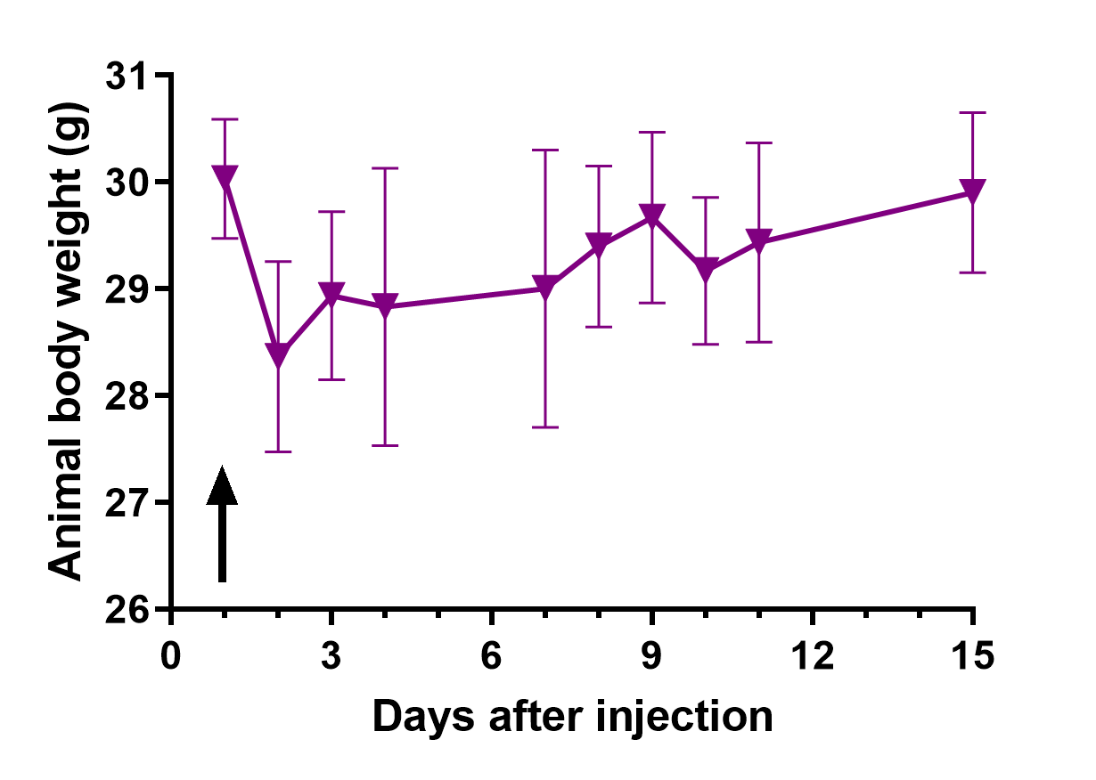


**Figure S5.** Acute toxicity of Conj2 on healthy male BALB/c mice. Animal body weight (grams, average ± SEM) in in vivo acute toxicity study of conjugate **Conj2** under dose of 25 mg/kg Dau content. ↑: treatment. 3 animals

**Table S1**. Effect of Dau-conjugates (10 mg Dau content/kg) and free Dau (1 mg /kg) in subcutaneous B16 murine melanoma bearing C57BL/6 male mice *in vivo*.

| **Parameter** | **Treatment** | | | | |
| --- | --- | --- | --- | --- | --- |
| **Control** | **Dau** | **Conj1** | **Conj2** | **Conj3** |
| **Animal body weight** | +9.4 | +7.6 | +12.9 | +8.5 | +18.2 |
| **Tumor volume in mm3** |  | -4.9 | -23.8 | -37.8 | +12.3 |
| **Tumor volume in %** |  | +58.8 | +9.7 | -75.4 | -14.7 |
| **Tumor weight** |  | -17.0 | -2.4 | -38.6 | +9.2 |

Values represent percentage (%) where minus means decreasing of animal body weight at the end of experiment compared to the start, inhibition of tumor compared to control group, decreasing of tumor weight compared to control group.

**Figure S6**. Determination of *in vivo* toxicity of **Conj2** and **Conj4** in OCM-1 bearing male NOD-SCID mice


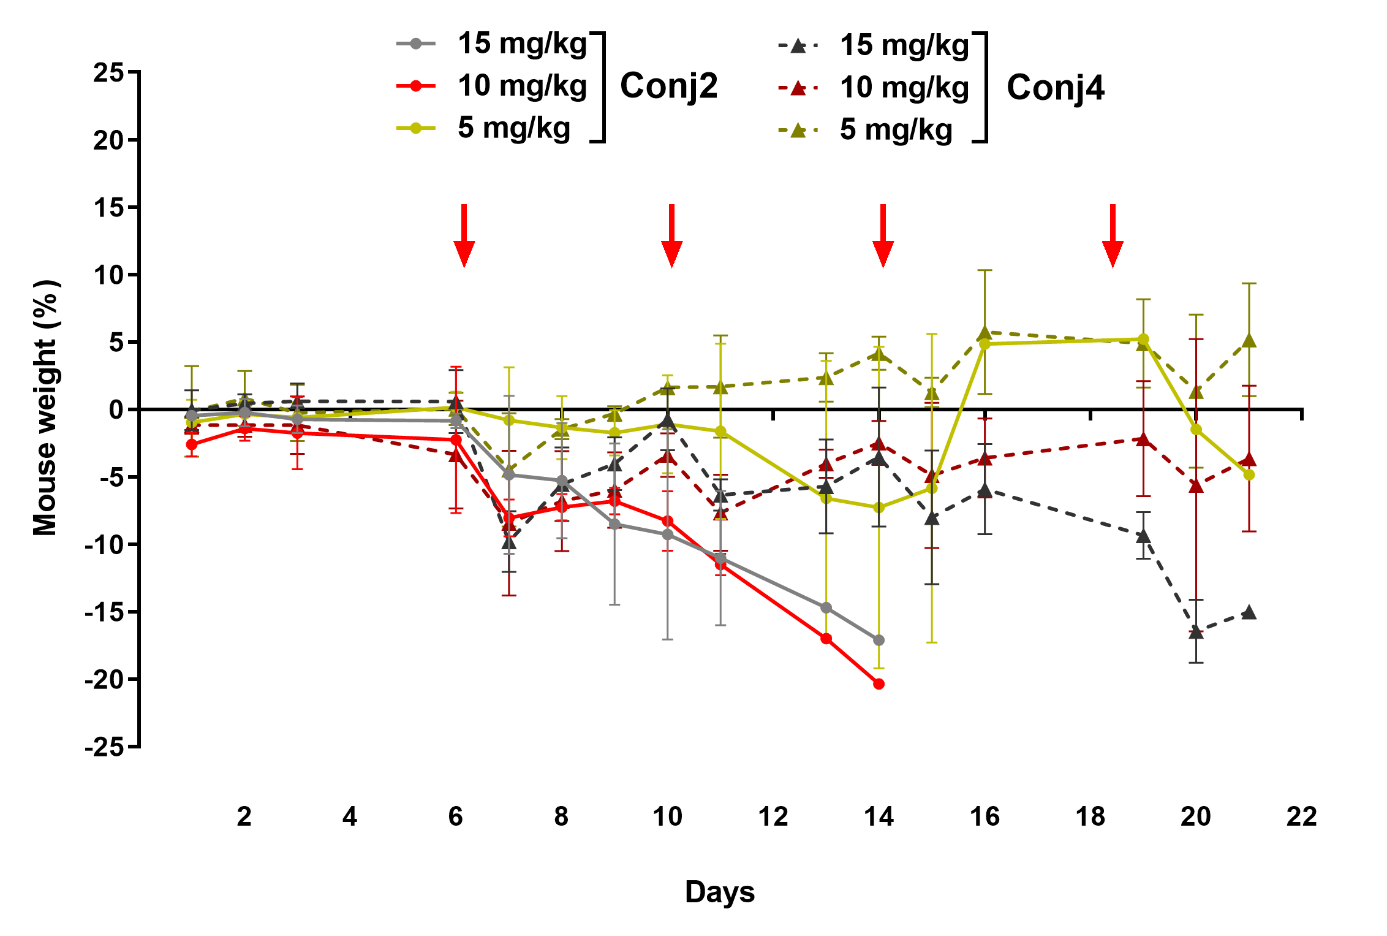

Supplement: Supplementary file 1 [file supplementary]
